# Supplementary material
Source: PubMed Central journal article supplement (PMC3740404)
Supplement: NIHMS494016-supplement-Supfigure3.pdf [file NIHMS494016-supplement-Supfigure3.pdf]

|              |                                        | Cleavage<br>site |
|--------------|----------------------------------------|------------------|
| RMPLFEMC-1   | MLTN <b>LGIILLVA</b> SVTCLG            | AEWK             |
| RMPLFEMC-97  | MA <b>KLLVLCIA</b> CQVSLCLA            | GPSP             |
| RMPLFEMC-98  | MVCF <b>LAIISFILLI</b> FFDVSYY         | LRIV             |
| RMPLFEMC-232 | MYC <b>KGLLVAVVAVALL</b> QIISA         | EPCY             |
| RMPLFEMC-277 | MDWR <b>WLLVISTI</b> YFQQVHS           | IQEI             |
| RMPLFEMC-296 | MW <b>KLNIVLLLVV</b> SVVAS             | TVHC             |
| RMPLFEMC-417 | MC <b>RQILCVAIL</b> FVVAWA             | QERR             |
| RMPLFEMC-531 | MD <b>KY</b> TFT <b>ITLLVI</b> TICNSLG | ENLI             |
