# Supplementary material
Source: PubMed Central journal article supplement (PMC3740404)

**A**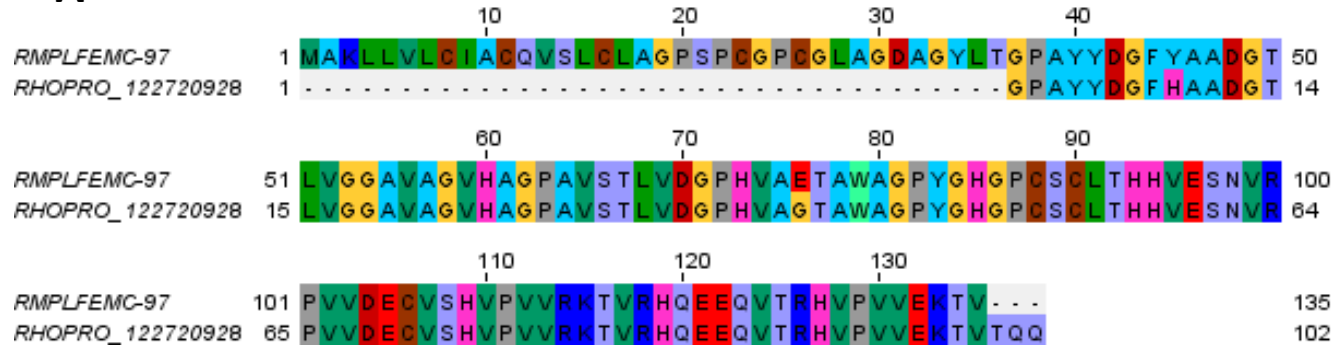**B**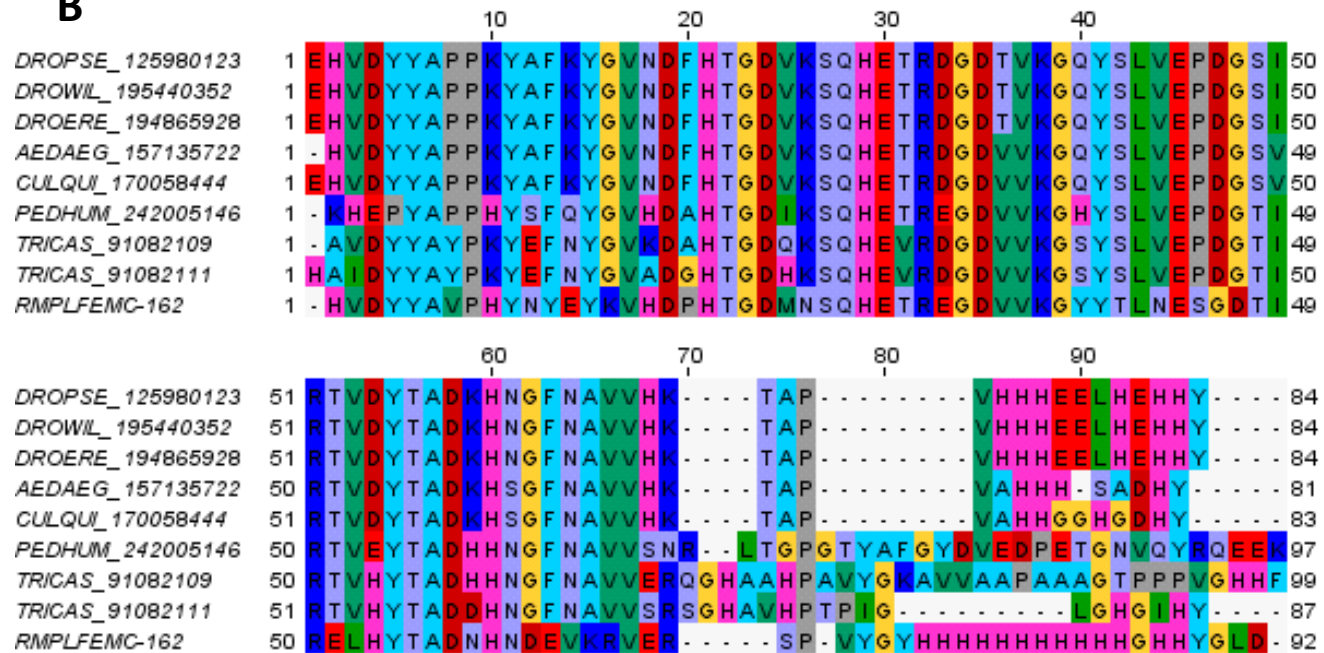

Supplement: NIHMS494016-supplement-Supfigure1.pdf [file NIHMS494016-supplement-Supfigure1.pdf]
